# Supplementary material for: Machine Learning for Mineral Identification and Ore Estimation from Hyperspectral Imagery in Tin–Tungsten Deposits: Simulation under Indoor Conditions
Source: MDPI journal article supplement (doi:10.3390/rs13163258), 2021-08-18
Supplement: s1 [file s1]

## Supplementary Materials

**Table S1.** Description of target types in the panel of hand samples.

| Class Acronym | Material        | Description                                                                                                        |
|---------------|-----------------|--------------------------------------------------------------------------------------------------------------------|
| Css           | Cassiterite     | Minerals                                                                                                           |
| Chal          | Chalcopyrite    |                                                                                                                    |
| Mal           | Malachite       |                                                                                                                    |
| Mus           | Muscovite       |                                                                                                                    |
| Wlf           | Wolframite      |                                                                                                                    |
| Scl           | Schorl          |                                                                                                                    |
| Qtz_0         | Quartz          | Differently colored quartz fragments                                                                               |
| Qtz_1         |                 |                                                                                                                    |
| Qtz_2         |                 |                                                                                                                    |
| Qtz_3         |                 |                                                                                                                    |
| Qtz_4         |                 |                                                                                                                    |
| Qtz_5         |                 |                                                                                                                    |
| Oxid          | Oxidized        | Surface with appearance of Iron oxide                                                                              |
| Alter-1       | Alteration      | Hydrothermal alteration                                                                                            |
| Alter-2       |                 |                                                                                                                    |
| U-1           | Unknown         | Patches of consisting coloration in the PC composite of unknown material. Small grains of minerals can be observed |
| Smg           | Small grains    | Unidentified small grains with similar texture and color                                                           |
| Ref           | Reference       | WCS-MC-020 reference                                                                                               |
| White         | White reference | Sphere Optics SG 3141 95%.                                                                                         |
| Tie           | Tie             | Ties to hold samples to the panel                                                                                  |

**Table S2.** Accuracy metrics of all panel materials: LDA, SVM and RF classifications.

|                       | LDA                    |                    |       | SVM                    |                    |       | RF                     |                    |       |
|-----------------------|------------------------|--------------------|-------|------------------------|--------------------|-------|------------------------|--------------------|-------|
|                       | Producer's<br>accuracy | User's<br>accuracy | F1    | Producer's<br>accuracy | User's<br>accuracy | F1    | Producer's<br>accuracy | User's<br>accuracy | F1    |
| Cassiterite           | 0.788                  | 0.590              | 0.675 | 0.524                  | 0.478              | 0.500 | 0.519                  | 0.701              | 0.597 |
| Chalcopyrite          | 0.871                  | 0.450              | 0.593 | 0.833                  | 0.588              | 0.690 | 0.613                  | 0.528              | 0.567 |
| Malachite             | 1.000                  | 1.000              | 1.000 | 1.000                  | 0.742              | 0.852 | 1.000                  | 1.000              | 1.000 |
| Muscovite             | 0.529                  | 0.947              | 0.679 | 0.643                  | 0.600              | 0.621 | 0.559                  | 0.655              | 0.603 |
| Quartz_0              | 0.863                  | 1.000              | 0.926 | 0.894                  | 0.868              | 0.881 | 0.849                  | 0.816              | 0.832 |
| Quartz_1              | 0.602                  | 1.000              | 0.752 | 0.760                  | 0.919              | 0.832 | 0.785                  | 0.869              | 0.825 |
| Quartz_2              | 1.000                  | 0.627              | 0.771 | 0.966                  | 0.838              | 0.898 | 0.942                  | 0.903              | 0.922 |
| Quartz_3              | 1.000                  | 1.000              | 1.000 | 1.000                  | 1.000              | 1.000 | 1.000                  | 1.000              | 1.000 |
| Quartz_4              | 1.000                  | 0.905              | 0.950 | 0.750                  | 1.000              | 0.857 | 1.000                  | 0.905              | 0.950 |
| Quartz_5              | 0.966                  | 0.878              | 0.920 | 0.986                  | 0.922              | 0.953 | 1.000                  | 0.937              | 0.967 |
| Reference             | 1.000                  | 1.000              | 1.000 | 1.000                  | 1.000              | 1.000 | 1.000                  | 1.000              | 1.000 |
| Wolframite            | 0.789                  | 0.951              | 0.862 | 0.769                  | 0.861              | 0.812 | 0.912                  | 0.854              | 0.882 |
| White                 | 1.000                  | 1.000              | 1.000 | 1.000                  | 1.000              | 1.000 | 1.000                  | 0.997              | 0.999 |
| Ties                  | 0.980                  | 1.000              | 0.990 | 0.985                  | 1.000              | 0.992 | 0.990                  | 1.000              | 0.995 |
| Unknown               | 0.939                  | 0.596              | 0.729 | 0.808                  | 0.840              | 0.824 | 0.818                  | 0.730              | 0.771 |
| Small grains          | 0.716                  | 0.738              | 0.727 | 0.730                  | 0.818              | 0.771 | 0.813                  | 0.741              | 0.776 |
| Oxidized_1            | 0.854                  | 1.000              | 0.921 | 0.565                  | 0.684              | 0.619 | 0.805                  | 0.868              | 0.835 |
| Oxidized_2            | 0.917                  | 0.733              | 0.815 | 0.700                  | 0.467              | 0.560 | 0.667                  | 0.667              | 0.667 |
| Oxidized<br>muscovite | 0.083                  | 0.250              | 0.125 | 0.400                  | 0.118              | 0.182 | 0.167                  | 0.400              | 0.235 |
| Oxidized_3            | 0.778                  | 0.750              | 0.764 | 1.000                  | 0.778              | 0.875 | 0.889                  | 0.857              | 0.873 |
| Schorl                | 1.000                  | 0.917              | 0.957 | 0.778                  | 0.583              | 0.667 | 0.000                  |                    |       |
